# Supplementary material for: Country performance against COVID-19: rankings for 35 countries
Source: HighWire-hosted journal article supplement (doi:10.1136/bmjgh-2020-003047), 2020-12-01
Supplement: bmjgh-2020-003047supp002_data_supplement.xlsx [file bmjgh-2020-003047supp002_data_supplement.xlsx]

## Sheet: Explanation
The 28 countries in this file are listed in alphabetical order.
Country-specific time series data are presented for each country up to that country's day 65.
At revision of the paper, day 135 was added and relevant data for those are included in the supplementary data tables.
Note: Where there is an empty cell in the column of doubling time, it means that calculation cannot be made when the rate of change is zero.

## Sheet: Australia
Australia				Australia Population: 25 millon
				Per million Population
		Cumulative	Cumulative	Cumulative	Cumulative	Change	Change	Doubling	Doubling
		Cases	Deaths	Cases	deaths	rate, cases	rate, deaths	time, cases	time, death
2.22	Day 1	21		0.84
2.23	Day 2	22		0.88
2.24	Day 3	22		0.88		0.0227429		30.4775
2.25	Day 4	22		0.88		0.0111129		62.373
2.26	Day 5	23		0.92		0.0319583		21.6891
2.27	Day 6	23		0.92		0.0319583		21.6891
2.28	Day 7	25		1		0.0579504		11.961
2.29	Day 8	25		1		0.0902533		7.68002
3.1	Day 9	29	1	1.16	0.04	0.111171		6.23494
3.2	Day 10	33	2	1.32	0.08	0.187854		3.68982
3.3	Day 11	39	2	1.56	0.08	0.181762	0.173287	3.81348	4
3.4	Day 12	53	2	2.12	0.08	0.161657	0.101366	4.28777	6.83805
3.5	Day 13	60	2	2.4	0.08	0.160126	0.101366	4.32876	6.83805
3.6	Day 14	63	3	2.52	0.12	0.112137	0.101366	6.18124	6.83805
3.7	Day 15	74	3	2.96	0.12	0.109564	0.101366	6.32643	6.83805
3.8	Day 16	83	3	3.32	0.12	0.152614	0	4.54184
3.9	Day 17	93	3	3.72	0.12	0.136991	0	5.05979
3.10	Day 18	116	3	4.64	0.12	0.157754	0	4.39385
3.11	Day 19	128	3	5.12	0.12	0.190176	0	3.64476
3.12	Day 20	156	3	6.24	0.12	0.18996	0	3.64892
3.13	Day 21	199	3	7.96	0.12	0.212938	0.127706	3.25516	5.42766
3.14	Day 22	248	3	9.92	0.12	0.236026	0.127706	2.93674	5.42766
3.15	Day 23	300	5	12	0.2	0.206748	0.127706	3.35262	5.42766
3.16	Day 24	401	5	16.04	0.2	0.219203	0.173287	3.16212	4
3.17	Day 25	455	5	18.2	0.2	0.231065	0.0841181	2.9998	8.24017
3.18	Day 26	596	6	23.84	0.24	0.209768	0.0841181	3.30436	8.24017
3.19	Day 27	756	7	30.24	0.28	0.214246	0.0841181	3.23529	8.24017
3.20	Day 28	928	7	37.12	0.28	0.248282	0.0385377	2.79178	17.9862
3.21	Day 29	1072	7	42.88	0.28	0.228676	0.0333828	3.03114	20.7636
3.22	Day 30	1609	7	64.36	0.28	0.228749	0.112996	3.03016	6.13425
3.23	Day 31	1887	8	75.48	0.32	0.228699	0.112996	3.03082	6.13425
3.24	Day 32	2317	11	92.68	0.44	0.159882	0.15476	4.33536	4.47886
3.25	Day 33	2676	11	107.04	0.44	0.145574	0.121377	4.76148	5.7107
3.26	Day 34	3050	13	122	0.52	0.112584	0.0602905	6.15671	11.4968
3.27	Day 35	3378	13	135.12	0.52	0.110478	0.10883	6.27406	6.36911
3.28	Day 36	3635	14	145.4	0.56	0.0950018	0.0948724	7.29615	7.3061
3.29	Day 37	4163	17	166.52	0.68	0.0858985	0.107696	8.06938	6.43616
3.30	Day 38	4460	19	178.4	0.76	0.0820958	0.124109	8.44316	5.58498
3.31	Day 39	4763	20	190.52	0.8	0.0610272	0.0964156	11.358	7.18916
4.1	Day 40	5048	23	201.92	0.92	0.0503001	0.0969414	13.7802	7.15017
4.2	Day 41	5314	25	212.56	1	0.0382301	0.101366	18.131	6.83805
4.3	Day 42	5454	28	218.16	1.12	0.0325519	0.118856	21.2936	5.83183
4.4	Day 43	5550	30	222	1.2	0.0259399	0.146947	26.7213	4.717
4.5	Day 44	5750	37	230	1.48	0.023352	0.139904	29.6825	4.95445
4.6	Day 45	5895	45	235.8	1.8	0.0216477	0.127706	32.0194	5.42766
4.7	Day 46	5988	49	239.52	1.96	0.0168943	0.0802269	41.0284	8.63983
4.8	Day 47	6052	50	242.08	2	0.0141388	0.0455804	49.0246	15.2071
4.9	Day 48	6152	51	246.08	2.04	0.0128171	0.0333828	54.08	20.7636
4.10	Day 49	6238	54	249.52	2.16	0.0105556	0.0413786	65.6666	16.7513
4.11	Day 50	6303	56	252.12	2.24	0.00827348	0.0447621	83.7794	15.4852
4.12	Day 51	6313	59	252.52	2.36	0.00640959	0.0304725	108.142	22.7467
4.13	Day 52	6359	61	254.36	2.44	0.0056473	0.0294458	122.74	23.5398
4.14	Day 53	6400	61	256	2.44	0.00606399	0.0163993	114.306	42.2668
4.15	Day 54	6447	63	257.88	2.52	0.00674878	0.0158784	102.707	43.6536
4.16	Day 55	6468	63	258.72	2.52	0.00716205	0.0344053	96.7806	20.1465
4.17	Day 56	6533	65	261.32	2.6	0.00631782	0.0298863	109.713	23.1928
4.18	Day 57	6586	70	263.44	2.8	0.00599586	0.0298863	115.604	23.1928
4.19	Day 58	6612	71	264.48	2.84	0.00424961	0.0220732	163.108	31.4023
4.20	Day 59	6625	71	265	2.84	0.00238007	0.0138925	291.23	49.8938
4.21	Day 60	6645	71	265.8	2.84	0.00207095	0.0137021	334.7	50.5871
4.22	Day 61	6649	74	265.96	2.96	0.00187971	0.026692	368.753	25.9684
4.23	Day 62	6667	75	266.68	3	0.00187407	0.0298367	369.862	23.2314
4.24	Day 63	6675	79	267	3.16	0.00250657	0.0286939	276.532	24.1566
4.25	Day 64	6695	80	267.8	3.2	0.00197954	0.0253381	350.155	27.3559
4.26	Day 65	6716	83	268.64	3.32	0.00234849	0.0269722	295.147	25.6985
4.27	Day 66	6720	83	268.8	3.32
4.28	Day 67	6738	88	269.52	3.52
7.3	Day 133	8255	104	330.2	4.16
7.4	Day 134	8362	104	334.48	4.16
7.5	Day 135	8449	104	337.96	4.16	0.0147015	0.00476205	47.1481	145.557
7.6	Day 136	8586	106	343.44	4.24
7.7	Day 137	8755	106	350.2	4.24

## Sheet: Austria
Austria			Austria population: 9 million
				Per million Population
		Cumulative	Cumulative	Cumulative	Cumulative	Cases	Deaths	Doubling time	Doubling time
		Cases	Deaths	cases	deaths	change rate	change rate	Time, cases	deaths
3.3	Day 1	24		2.66667
3.4	Day 2	29		3.22222
3.5	Day 3	43		4.77778		0.304099		2.27935
3.6	Day 4	66		7.33333		0.319274		2.17101
3.7	Day 5	81		9		0.278499		2.48887
3.8	Day 6	104		11.5556		0.253588		2.73336
3.9	Day 7	131		14.5556		0.277721		2.49584
3.10	Day 8	182		20.2222		0.311122		2.2279
3.11	Day 9	246		27.3333		0.336845		2.05776
3.12	Day 10	361	1	40.1111	0.111111	0.320157		2.16502
3.13	Day 11	504	1	56	0.111111	0.3129		2.21523
3.14	Day 12	655	1	72.7778	0.111111	0.259179	0.274653	2.67439	2.52372
3.15	Day 13	860	1	95.5556	0.111111	0.242965	0.346574	2.85287	2
3.16	Day 14	1018	3	113.111	0.333333	0.230367	0.346574	3.00888	2
3.17	Day 15	1332	4	148	0.444444	0.232422	0.44794	2.98228	1.54741
3.18	Day 16	1646	4	182.889	0.444444	0.239086	0.173287	2.89916	4
3.19	Day 17	2179	6	242.111	0.666667	0.202315	0.173287	3.42608	4
3.20	Day 18	2649	6	294.333	0.666667	0.194393	0.346574	3.56569	2
3.21	Day 19	2992	8	332.444	0.888889	0.179854	0.313191	3.85394	2.21318
3.22	Day 20	3582	16	398	1.77778	0.172578	0.385111	4.01643	1.79986
3.23	Day 21	4474	21	497.111	2.33333	0.15617	0.338636	4.43842	2.04688
3.24	Day 22	5283	28	587	3.11111	0.164226	0.279808	4.22069	2.47723
3.25	Day 23	5588	31	620.889	3.44444	0.135637	0.25398	5.11031	2.72914
3.26	Day 24	6909	49	767.667	5.44444	0.112065	0.221826	6.18521	3.12474
3.27	Day 25	7697	58	855.222	6.44444	0.113191	0.25509	6.12367	2.71726
3.28	Day 26	8271	68	919	7.55556	0.0827029	0.197578	8.38118	3.50823
3.29	Day 27	8788	86	976.444	9.55556	0.0698986	0.197897	9.91647	3.50257
3.30	Day 28	9618	108	1068.67	12	0.064629	0.191025	10.725	3.62857
3.31	Day 29	10180	128	1131.11	14.2222	0.0590418	0.152062	11.7399	4.55832
4.1	Day 30	10711	146	1190.11	16.2222	0.0451989	0.110458	15.3355	6.2752
4.2	Day 31	11129	158	1236.56	17.5556	0.0365158	0.0934291	18.9821	7.41896
4.3	Day 32	11524	168	1280.44	18.6667	0.0294691	0.0836283	23.5212	8.28842
4.4	Day 33	11781	186	1309	20.6667	0.0249503	0.0827581	27.7812	8.37558
4.5	Day 34	12051	204	1339	22.6667	0.0230889	0.0922744	30.0208	7.51181
4.6	Day 35	12297	220	1366.33	24.4444	0.0234974	0.0959313	29.4988	7.22546
4.7	Day 36	12639	243	1404.33	27	0.0235992	0.0922138	29.3716	7.51674
4.8	Day 37	12942	273	1438	30.3333	0.0244422	0.0928909	28.3586	7.46195
4.9	Day 38	13244	295	1471.56	32.7778	0.022079	0.0817554	31.394	8.47831
4.10	Day 39	13560	319	1506.67	35.4444	0.0186608	0.0621153	37.1446	11.159
4.11	Day 40	13806	337	1534	37.4444	0.0146093	0.0552769	47.4458	12.5395
4.12	Day 41	13945	350	1549.44	38.8889	0.0119867	0.0463629	57.8261	14.9505
4.13	Day 42	14041	368	1560.11	40.8889	0.00966167	0.0384317	71.742	18.0358
4.14	Day 43	14226	384	1580.67	42.6667	0.00934277	0.039556	74.1907	17.5232
4.15	Day 44	14350	393	1594.44	43.6667	0.00967435	0.0395063	71.648	17.5452
4.16	Day 45	14476	410	1608.44	45.5556	0.00770037	0.0357318	90.0148	19.3986
4.17	Day 46	14595	431	1621.67	47.8889	0.00685634	0.0349681	101.096	19.8222
4.18	Day 47	14671	443	1630.11	49.2222	0.0054493	0.0341439	127.199	20.3008
4.19	Day 48	14749	452	1638.78	50.2222	0.00471712	0.032584	146.943	21.2726
4.20	Day 49	14795	470	1643.89	52.2222	0.00429123	0.0352102	161.527	19.686
4.21	Day 50	14873	491	1652.56	54.5556	0.00425206	0.0359964	163.014	19.256
4.22	Day 51	14925	510	1658.33	56.6667	0.00462077	0.0300361	150.007	23.0772
4.23	Day 52	15002	522	1666.89	58	0.00458026	0.0219225	151.334	31.6181
4.24	Day 53	15071	530	1674.56	58.8889	0.00497529	0.0152138	139.318	45.5604
4.25	Day 54	15148	536	1683.11	59.5556	0.00449213	0.0126077	154.303	54.978
4.26	Day 55	15225	542	1691.67	60.2222	0.00469976	0.0177509	147.486	39.0487
4.27	Day 56	15274	549	1697.11	61	0.00415722	0.0197235	166.734	35.1432
4.28	Day 57	15357	569	1706.33	63.2222	0.00369991	0.0186587	187.342	37.1486
4.29	Day 58	15402	580	1711.33	64.4444	0.0041715	0.0175819	166.163	39.4238
4.30	Day 59	15452	584	1716.89	64.8889	0.00325089	0.0115901	213.217	59.8053
5.1	Day 60	15531	589	1725.67	65.4444	0.0031453	0.00764066	220.375	90.7182
5.2	Day 61	15558	596	1728.67	66.2222	0.00271943	0.00675717	254.887	102.58
5.3	Day 62	15597	598	1733	66.4444	0.00190822	0.00711345	363.242	97.4418
5.4	Day 63	15621	600	1735.67	66.6667	0.00201653	0.00498355	343.733	139.087
5.5	Day 64	15650	606	1738.89	67.3333	0.00247219	0.00455688	280.378	152.11
5.6	Day 65	15684	608	1742.67	67.5556	0.00243671	0.00576632	284.46	120.206
5.7	Day 66	15752	609	1750.22	67.6667
5.8	Day 67	15774	614	1752.67	68.2222
7.14	Day 133	19021	709	2113.44
7.15	Day 134	19154	710	2128.22
7.16	Day 135	19270	710	2141.11	78.8889	0.00715186	0.000352361	96.9185	1967.15
7.17	Day 136	19439	710	2159.89
7.18	Day 137	19573	710	2174.78

## Sheet: Belgium
Belgium				Belgium Population: 11.42 millon
				Per million Population
		Cumulative	Cumulative	Cumulative	Cumulative	Change	Change	Doubling	Doubling
		Cases	Deaths	cases	deaths	rate, cases	rate, deaths	time, cases	time, death
3.4	Day 1	23		2.01401
3.5	Day 2	50		4.37828
3.6	Day 3	109		9.54466		0.540706		1.28193
3.7	Day 4	169		14.7986		0.39111		1.77226
3.8	Day 5	200		17.5131		0.223975		3.09475
3.9	Day 6	239		20.9282		0.154874		4.47557
3.10	Day 7	267		23.38		0.172661		4.0145
3.11	Day 8	314	3	27.4956	0.262697	0.212421		3.26307
3.12	Day 9	399	4	34.9387	0.350263	0.236998		2.92469
3.13	Day 10	559	5	48.9492	0.437828	0.259331	0.366584	2.67283	1.89083
3.14	Day 11	689	8	60.3327	0.700525	0.243794	0.389536	2.84317	1.77942
3.15	Day 12	886	13	77.5832	1.13835	0.199783	0.44794	3.46949	1.54741
3.16	Day 13	1058	19	92.6445	1.66375	0.19215	0.402359	3.60731	1.72271
3.17	Day 14	1243	30	108.844	2.62697	0.176511	0.390546	3.92694	1.77481
3.18	Day 15	1486	40	130.123	3.50263	0.189414	0.402359	3.65943	1.72271
3.19	Day 16	1795	62	157.18	5.42907	0.204359	0.3685	3.39182	1.881
3.20	Day 17	2257	95	197.636	8.31874	0.206995	0.363196	3.34861	1.90847
3.21	Day 18	2815	131	246.497	11.4711	0.183721	0.31434	3.77283	2.20509
3.22	Day 19	3401	171	297.811	14.9737	0.159336	0.284121	4.35023	2.43962
3.23	Day 20	3743	218	327.758	19.0893	0.140449	0.260924	4.93523	2.65651
3.24	Day 21	4269	296	373.818	25.9194	0.151527	0.257509	4.57441	2.69174
3.25	Day 22	4937	372	432.312	32.5744	0.166448	0.245064	4.16434	2.82843
3.26	Day 23	6235	479	545.972	41.944	0.190156	0.218374	3.64515	3.17413
3.27	Day 24	7284	581	637.828	50.8757	0.196529	0.206586	3.52695	3.35525
3.28	Day 25	9134	709	799.825	62.0841	0.161569	0.183764	4.2901	3.77195
3.29	Day 26	10836	850	948.862	74.4308	0.140452	0.174788	4.9351	3.96564
3.30	Day 27	11899	999	1041.94	87.4781	0.100251	0.165952	6.91414	4.1768
3.31	Day 28	12775	1169	1118.65	102.364	0.0870278	0.159533	7.96466	4.34485
4.1	Day 29	13640	1377	1194.4	120.578	0.0857843	0.151056	8.08012	4.58868
4.2	Day 30	15348	1609	1343.96	140.893	0.091636	0.142124	7.56414	4.87705
4.3	Day 31	16770	1828	1468.48	160.07	0.0917888	0.131919	7.55155	5.25434
4.4	Day 32	18431	2064	1613.92	180.736	0.0761602	0.118044	9.10118	5.87193
4.5	Day 33	19691	2334	1724.26	204.378	0.0700576	0.109881	9.89396	6.30815
4.6	Day 34	20814	2580	1822.59	225.919	0.0597075	0.102816	11.609	6.74166
4.7	Day 35	22194	2837	1943.43	248.424	0.0595085	0.0966083	11.6479	7.17482
4.8	Day 36	23403	3114	2049.3	272.68	0.0619503	0.0905409	11.1888	7.65562
4.9	Day 37	24983	3435	2187.65	300.788	0.0582563	0.0863863	11.8982	8.02381
4.10	Day 38	26667	3706	2335.11	324.518	0.0591242	0.0802694	11.7236	8.63526
4.11	Day 39	28018	4008	2453.42	350.963	0.0505949	0.0707168	13.6999	9.80174
4.12	Day 40	29647	4293	2596.06	375.919	0.0385979	0.066482	17.9581	10.4261
4.13	Day 41	30587	4558	2678.37	399.124	0.0452188	0.0600409	15.3288	11.5446
4.14	Day 42	31119	4835	2724.96	423.38	0.0401288	0.0562397	17.2731	12.3249
4.15	Day 43	33573	5096	2939.84	446.235	0.0416925	0.0524509	16.6252	13.2152
4.16	Day 44	34809	5376	3048.07	470.753	0.0445083	0.0466553	15.5734	14.8568
4.17	Day 45	36138	5622	3164.45	492.294	0.034208	0.04228	20.2627	16.3942
4.18	Day 46	37183	5827	3255.95	510.245	0.0346446	0.0366572	20.0074	18.9089
4.19	Day 47	38496	6035	3370.93	528.459	0.0312883	0.0336106	22.1535	20.6228
4.20	Day 48	39983	6225	3501.14	545.096	0.029769	0.0324264	23.2842	21.376
4.21	Day 49	40956	6431	3586.34	563.135	0.0264784	0.0303876	26.1778	22.8102
4.22	Day 50	41885	6634	3667.69	580.911	0.0255931	0.028368	27.0834	24.4341
4.23	Day 51	42797	6815	3747.55	596.76	0.0253401	0.0257953	27.3538	26.8711
4.24	Day 52	44293	6973	3878.55	610.595	0.0241556	0.0229902	28.6951	30.1496
4.25	Day 53	45325	7130	3968.91	624.343	0.0217494	0.021499	31.8697	32.2409
4.26	Day 54	46134	7273	4039.75	636.865	0.0166006	0.0202725	41.7545	34.1914
4.27	Day 55	46687	7427	4088.18	650.35	0.0136001	0.0183165	50.9663	37.8427
4.28	Day 56	47334	7562	4144.83	662.172	0.0126013	0.0168147	55.0059	41.2226
4.29	Day 57	47859	7672	4190.81	671.804	0.0122518	0.0143569	56.5749	48.2797
4.30	Day 58	48519	7779	4248.6	681.173	0.0112718	0.0128233	61.4939	54.0536
5.1	Day 59	49032	7866	4293.52	688.792	0.0104705	0.0115574	66.1999	59.9742
5.2	Day 60	49517	7960	4335.99	697.023	0.00884833	0.0110025	78.3365	62.9989
5.3	Day 61	49906	8035	4370.05	703.59	0.0074196	0.0111268	93.4211	62.2955
5.4	Day 62	50267	8129	4401.66	711.821	0.00630156	0.0106373	109.996	65.162
5.5	Day 63	50509	8224	4422.85	720.14	0.00747149	0.0105699	92.7723	65.5775
5.6	Day 64	50781	8306	4446.67	727.32	0.00852661	0.00977087	81.2922	70.9401
5.7	Day 65	51420	8382	4502.63	733.975	0.0101221	0.00904522	68.4784	76.6313
5.8	Day 66	52011	8453	4554.38	740.193
5.9	Day 67	52596	8527	4605.6	746.673
7.15	Day 133	62872	9674	5505.43	847.11
7.16	Day 134	63039	9679	5520.05	847.548
7.17	Day 135	63238	9684	5537.48	847.986	0.00329446	0.000387337	210.398	1789.52
7.18	Day 136	63499	9686	5560.33	848.161
7.19	Day 137	63706	9689	5578.46	848.424

## Sheet: Canada
Canada				Canada population: 37.1 million
				Per million Population
		Cumulative	Cumulative	Cumulative	Cumulative	Change	Change	Doubling	Doubling
		Cases	Deaths	cases	deaths	rate, cases	rate, deaths	time, cases	time, death
2.29	Day 1	20		0.539084
3.1	Day 2	24		0.6469
3.2	Day 3	27		0.727763		0.132657		5.22511
3.3	Day 4	30		0.808625		0.108216		6.40522
3.4	Day 5	34		0.916442		0.173287		4
3.5	Day 6	37		0.997305		0.173287		4
3.6	Day 7	54		1.45553		0.165824		4.18003
3.7	Day 8	60		1.61725		0.183222		3.7831
3.8	Day 9	66		1.77898		0.141223		4.90817
3.9	Day 10	77	1	2.07547	0.0269542	0.151534		4.5742
3.10	Day 11	95	1	2.56065	0.0269542	0.191543		3.61875
3.11	Day 12	110	1	2.96496	0.0269542	0.236115		2.93563
3.12	Day 13	142	1	3.82749	0.0269542	0.243888		2.84207
3.13	Day 14	198	1	5.33693	0.0269542	0.282851		2.45058
3.14	Day 15	252	1	6.79245	0.0269542	0.283304	0.346574	2.44665	2
3.15	Day 16	341	1	9.19137	0.0269542	0.276331	0.51986	2.5084	1.33333
3.16	Day 17	441	4	11.8868	0.107817	0.264874	0.549306	2.61689	1.26186
3.17	Day 18	598	8	16.1186	0.215633	0.235013	0.621227	2.9494	1.11577
3.18	Day 19	727	9	19.5957	0.242588	0.225533	0.274653	3.07337	2.52372
3.19	Day 20	873	12	23.531	0.32345	0.19946	0.216249	3.47512	3.20531
3.20	Day 21	1087	12	29.2992	0.32345	0.176023	0.199627	3.93783	3.47221
3.21	Day 22	1328	19	35.7951	0.512129	0.218366	0.173287	3.17425	4
3.22	Day 23	1470	20	39.6226	0.539084	0.235834	0.193297	2.93913	3.58591
3.23	Day 24	2091	24	56.3612	0.6469	0.235686	0.15977	2.94097	4.33841
3.24	Day 25	2792	26	75.2561	0.700809	0.252931	0.166957	2.74046	4.15164
3.25	Day 26	3409	36	91.8868	0.97035	0.205494	0.20732	3.37308	3.34337
3.26	Day 27	4043	39	108.976	1.05121	0.176445	0.209062	3.92839	3.31551
3.27	Day 28	4757	55	128.221	1.48248	0.154325	0.147717	4.49148	4.6924
3.28	Day 29	5655	60	152.426	1.61725	0.15274	0.206269	4.5381	3.36041
3.29	Day 30	6320	65	170.35	1.75202	0.148385	0.151947	4.67128	4.56177
3.30	Day 31	7448	89	200.755	2.39892	0.135694	0.160463	5.10816	4.31966
3.31	Day 32	8612	101	232.129	2.72237	0.144894	0.244726	4.78381	2.83234
4.1	Day 33	9731	114	262.291	3.07278	0.126933	0.212225	5.46072	3.26609
4.2	Day 34	11283	173	304.124	4.66307	0.119899	0.206824	5.7811	3.35138
4.3	Day 35	12375	208	333.558	5.60647	0.116574	0.224648	5.94597	3.08548
4.4	Day 36	13912	231	374.987	6.22642	0.0975334	0.15609	7.10677	4.44068
4.5	Day 37	15512	280	418.113	7.54717	0.0922387	0.151315	7.51471	4.58081
4.6	Day 38	16667	323	449.245	8.7062	0.0836195	0.153592	8.2893	4.51292
4.7	Day 39	17897	381	482.399	10.2695	0.0729137	0.149415	9.5064	4.63909
4.8	Day 40	19438	427	523.935	11.5094	0.0710791	0.141557	9.75177	4.89659
4.9	Day 41	20765	509	559.704	13.7197	0.0661481	0.134694	10.4787	5.14607
4.10	Day 42	22148	569	596.981	15.3369	0.0566641	0.129573	12.2326	5.34947
4.11	Day 43	23318	653	628.518	17.6011	0.0531109	0.106711	13.0509	6.49553
4.12	Day 44	24383	717	657.224	19.3261	0.0501051	0.115461	13.8339	6.00333
4.13	Day 45	25680	780	692.183	21.0243	0.049106	0.109032	14.1153	6.35728
4.14	Day 46	27063	903	729.461	24.3396	0.0527096	0.127706	13.1503	5.42766
4.15	Day 47	28379	1010	764.933	27.2237	0.0544349	0.129622	12.7335	5.34745
4.16	Day 48	30106	1195	811.482	32.2102	0.0524698	0.121824	13.2104	5.68975
4.17	Day 49	31927	1310	860.566	35.31	0.0528243	0.112974	13.1217	6.13547
4.18	Day 50	33383	1470	899.811	39.6226	0.0503903	0.0866456	13.7556	7.9998
4.19	Day 51	35056	1587	944.906	42.7763	0.0462945	0.0841181	14.9725	8.24017
4.20	Day 52	36829	1690	992.695	45.5526	0.0463929	0.0736999	14.9408	9.405
4.21	Day 53	38422	1834	1035.63	49.434	0.0458346	0.0755565	15.1228	9.17389
4.22	Day 54	40190	1974	1083.29	53.2075	0.0438388	0.0772624	15.8113	8.97133
4.23	Day 55	42110	2147	1135.04	57.8706	0.041467	0.0739231	16.7156	9.3766
4.24	Day 56	43888	2302	1182.96	62.0485	0.0385732	0.0649863	17.9697	10.666
4.25	Day 57	45354	2465	1222.48	66.442	0.0353196	0.0579424	19.625	11.9627
4.26	Day 58	46895	2560	1264.02	69.0027	0.0327255	0.0541734	21.1807	12.795
4.27	Day 59	48500	2707	1307.28	72.965	0.0322413	0.0487716	21.4987	14.2121
4.28	Day 60	50026	2859	1348.41	77.062	0.0317059	0.0545328	21.8617	12.7107
4.29	Day 61	51597	2996	1390.75	80.7547	0.0317195	0.056321	21.8524	12.3071
4.30	Day 62	53236	3184	1434.93	85.8221	0.0313696	0.0552432	22.0962	12.5472
5.1	Day 63	55061	3391	1484.12	91.4016	0.0355189	0.0515445	19.5149	13.4475
5.2	Day 64	56714	3566	1528.68	96.1186	0.0330986	0.0477433	20.9419	14.5182
5.3	Day 65	59474	3682	1603.07	99.2453	0.0298586	0.0439655	23.2143	15.7657
5.4	Day 66	60772	3854	1638.06	103.881
5.5	Day 67	62046	4043	1672.4	108.976
7.10	Day 133	107126	8759	2887.49	236.092
7.11	Day 134	107347	8773	2893.45	236.469
7.12	Day 135	107590	8783	2900	236.739	0.00315386	0.00111067	219.778	624.08
7.13	Day 136	108155	8790	2915.23	236.927
7.14	Day 137	108486	8798	2924.15	237.143

## Sheet: Chile
Chile				Chile Population: 18.7 millon
				Per million Population
		Cumulative	Cumulative	Cumulative	Cumulative	Change	Change	Doubling	Doubling
		Cases	Deaths	cases	deaths	rate, cases	rate, deaths	time, cases	time, death
3.11	Day 1	23		1.22995
3.12	Day 2	33		1.76471
3.13	Day 3	43		2.29947		0.295498		2.34569
3.14	Day 4	61		3.26203		0.388337		1.78491
3.15	Day 5	75		4.0107		0.385526		1.79792
3.16	Day 6	156		8.34225		0.340349		2.03658
3.17	Day 7	201		10.7487		0.379331		1.82729
3.18	Day 8	238		12.7273		0.255797		2.70975
3.19	Day 9	342		18.2888		0.245673		2.82142
3.20	Day 10	434		23.2086		0.244155		2.83897
3.21	Day 11	537	1	28.7166	0.0534759	0.194979		3.55499
3.22	Day 12	632	1	33.7968	0.0534759	0.188375		3.67961
3.23	Day 13	746	2	39.893	0.106952	0.188635	0.274653	3.67455	2.52372
3.24	Day 14	922	2	49.3048	0.106952	0.181459	0.346574	3.81986	2
3.25	Day 15	1142	3	61.0695	0.160428	0.192316	0.229073	3.60421	3.02588
3.26	Day 16	1306	4	69.8396	0.213904	0.181947	0.274653	3.8096	2.52372
3.27	Day 17	1610	5	86.0963	0.26738	0.156889	0.211824	4.41806	3.27227
3.28	Day 18	1909	6	102.086	0.320856	0.157178	0.173287	4.40996	4
3.29	Day 19	2139	7	114.385	0.374332	0.132748	0.218867	5.22151	3.16698
3.30	Day 20	2449	8	130.963	0.427807	0.115578	0.245207	5.99721	2.82678
3.31	Day 21	2738	12	146.417	0.641711	0.178892	0.262456	3.87467	2.64101
4.1	Day 22	3031	16	162.086	0.855615	0.171905	0.284859	4.03216	2.4333
4.2	Day 23	3985	20	233.957	1.06952	0.144018	0.23727	4.81292	2.92134
4.3	Day 24	4375	25	260.481	1.3369	0.136571	0.222743	5.07537	3.11187
4.4	Day 25	4871	31	260.481	1.65775	0.0633614	0.185484	10.9396	3.73696
4.5	Day 26	5234	39	279.893	2.08556	0.0785045	0.135581	8.8294	5.11242
4.6	Day 27	5637	42	301.444	2.24599	0.0718178	0.109303	9.65146	6.34149
4.7	Day 28	5989	43	320.267	2.29947	0.072362	0.0948724	9.57889	7.3061
4.8	Day 29	6492	48	347.166	2.56684	0.0750278	0.109179	9.23854	6.3487
4.9	Day 30	6991	57	373.85	3.04813	0.0757625	0.132315	9.14895	5.23862
4.10	Day 31	7610	65	406.952	3.47594	0.0657214	0.127706	10.5468	5.42766
4.11	Day 32	8109	73	433.636	3.90374	0.0577876	0.090917	11.9947	7.62396
4.12	Day 33	8444	80	451.551	4.27807	0.0492761	0.0868503	14.0666	7.98094
4.13	Day 34	8809	82	471.07	4.38503	0.0444009	0.0632088	15.6111	10.966
4.14	Day 35	9268	92	495.615	4.91979	0.0499145	0.0679834	13.8867	10.1958
4.15	Day 36	9685	94	517.914	5.02674	0.0516596	0.0867177	13.4176	7.99314
4.16	Day 37	10310	105	551.337	5.61497	0.051542	0.0786233	13.4482	8.81605
4.17	Day 38	10831	116	579.198	6.20321	0.0495709	0.0867636	13.9829	7.98892
4.18	Day 39	11390	126	609.091	6.73797	0.0441009	0.0701284	15.7173	9.88397
4.19	Day 40	11809	133	631.497	7.1123	0.0393837	0.0592106	17.5999	11.7065
4.20	Day 41	12299	139	657.701	7.43316	0.0372866	0.059723	18.5897	11.606
4.21	Day 42	12679	147	678.021	7.86096	0.0394222	0.0584037	17.5826	11.8682
4.22	Day 43	13222	160	707.059	8.55615	0.039497	0.0561453	17.5494	12.3456
4.23	Day 44	13826	168	739.358	8.98396	0.0428577	0.0520161	16.1732	13.3256
4.24	Day 45	14404	174	770.267	9.30481	0.0414113	0.0416433	16.7381	16.6449
4.25	Day 46	15050	181	804.813	9.67914	0.0391208	0.0410758	17.7181	16.8748
4.26	Day 47	15604	189	834.439	10.107	0.0386765	0.0434159	17.9217	15.9653
4.27	Day 48	16168	198	864.599	10.5882	0.0366033	0.0441953	18.9367	15.6837
4.28	Day 49	16814	207	899.144	11.0695	0.0459833	0.0458008	15.0739	15.134
4.29	Day 50	17423	216	931.711	11.5508	0.0520219	0.0417635	13.3241	16.597
4.30	Day 51	18755	227	1002.94	12.139	0.0623656	0.0441674	11.1143	15.6936
5.1	Day 52	19908	234	1064.6	12.5134	0.0695888	0.0463508	9.96062	14.9544
5.2	Day 53	21578	247	1153.9	13.2086	0.0633302	0.043368	10.945	15.9829
5.3	Day 54	23015	260	1230.75	13.9037	0.0645126	0.0403625	10.7444	17.1731
5.4	Day 55	24162	270	1292.09	14.4385	0.0558276	0.0322416	12.4159	21.4985
5.5	Day 56	25769	275	1378.02	14.7059	0.0558054	0.0229519	12.4208	30.2
5.6	Day 57	26977	281	1442.62	15.0267	0.0574071	0.0212895	12.0742	32.5582
5.7	Day 58	28771	285	1538.56	15.2406	0.0530291	0.0250642	13.0711	27.6549
5.8	Day 59	30399	294	1625.61	15.7219	0.0562655	0.0261621	12.3192	26.4943
5.9	Day 60	31858	304	1703.64	16.2567	0.0503272	0.0312908	13.7728	22.1518
5.10	Day 61	33786	312	1806.74	16.6845	0.0499837	0.0628286	13.8675	11.0323
5.11	Day 62	35187	323	1881.66	17.2727	0.0583995	0.0622798	11.8691	11.1296
5.12	Day 63	37127	378	1985.4	20.2139	0.0623381	0.0713188	11.1192	9.71899
5.13	Day 64	40241	390	2151.93	20.8556	0.0685245	0.0795431	10.1153	8.71411
5.14	Day 65	43354	415	2318.4	22.1925	0.0667584	0.0571052	10.3829	12.1381
5.15	Day 66	46283	444	2475.03	23.7433
5.16	Day 67	48491	475	2593.1	25.4011
7.21	Day 133	334752	8677	17901.2	464.011
7.22	Day 134	336471	8722	17993.1	466.417
7.23	Day 135	338829	8838	18119.2	472.62	0.00656862	0.00969212	105.524	71.5166
7.24	Day 136	341375	8914	18255.3	476.684
7.25	Day 137	343664	9020	18377.8	482.353

## Sheet: China
China			Population: 1,395.4 million
				Per million Population
		Cumulative	Cumulative	Cumulative	Cumulative	Change	Change	Doubling	Doubling
		Cases	Deaths	cases	deaths	rate, cases	rate, deaths	time, cases	time, death
1.1	Day 1
1.2	Day 2
1.3	Day 3
1.4	Day 4		See note below
1.5	Day 5
1.6	Day 6
1.7	Day 7
1.8	Day 8
1.9	Day 9
1.10	Day 10
1.11	Day 11
1.12	Day 12
1.13	Day 13
1.14	Day 14
1.15	Day 15
1.16	Day 16
1.17	Day 17
1.18	Day 18
1.19	Day 19	488.46	5.63216	0.35005	0.00403623
1.20	Day 20	671.165	8.71953	0.480984	0.00624876
1.21	Day 21	1003.72	13.3506	0.719307	0.00956756	0.30086	0.47035	2.30389	1.47368
1.22	Day 22	1243.58	25.7	0.891201	0.0184177	0.29973	0.486808	2.31257	1.42386
1.23	Day 23	1627.33	36.9621	1.16621	0.0264886	0.27482	0.447377	2.52218	1.54936
1.24	Day 24	2225.94	61.1174	1.5952	0.0437992	0.288411	0.371789	2.40333	1.86436
1.25	Day 25	3013.18	79.9232	2.15937	0.0572762	0.30616	0.352954	2.264	1.96385
1.26	Day 26	3941.81	113.709	2.82486	0.0814888	0.294336	0.280912	2.35495	2.46749
1.27	Day 27	5537.71	151.67	3.96855	0.108693	0.279737	0.274469	2.47785	2.52542
1.28	Day 28	7224.83	188	5.1776	0.134729	0.267555	0.241618	2.59067	2.86877
1.29	Day 29	9225.26	239.593	6.61119	0.171702	0.231828	0.218066	2.98992	3.17861
1.30	Day 30	11494.4	298.903	8.23736	0.214206	0.216885	0.204054	3.19592	3.39689
1.31	Day 31	13997.7	362.845	10.0313	0.260029	0.202427	0.186174	3.42419	3.72312
2.01	Day 32	17202.7	425.242	12.3281	0.304746	0.192227	0.171955	3.60587	4.03098
2.02	Day 33	20731.5	504.533	14.857	0.361569	0.190298	0.159324	3.64242	4.35054
2.03	Day 34	24798.2	594.63	17.7714	0.426136	0.1763	0.154064	3.93163	4.49907
2.04	Day 35	29966.7	686.271	21.4753	0.491809	0.157636	0.143392	4.39713	4.83394
2.05	Day 36	34822.6	787.542	24.9552	0.564385	0.141087	0.134356	4.9129	5.15903
2.06	Day 37	38946.8	895.338	27.9109	0.641635	0.113309	0.127101	6.11734	5.45353
2.07	Day 38	43602.7	1017.76	31.2475	0.729371	0.0970359	0.120976	7.1432	5.72962
2.08	Day 39	47149.4	1141.02	33.7891	0.817699	0.0853232	0.115678	8.12378	5.99205
2.09	Day 40	51336.9	1277.71	36.7901	0.915655	0.0692308	0.106493	10.0121	6.50885
2.10	Day 41	54789	1422.13	39.264	1.01916	0.0603325	0.103016	11.4888	6.72851
2.11	Day 42	57514.8	1558.28	41.2174	1.11672	0.0554497	0.0975989	12.5005	7.10199
2.12	Day 43	60018.3	1722.86	43.0116	1.23467	0.0493223	0.0955851	14.0534	7.25162
2.13	Day 44	64084.8	1887.89	45.9258	1.35294	0.0446319	0.0953106	15.5303	7.27251
2.14	Day 45	66738.3	2084.44	47.8274	1.49379	0.0413531	0.0854107	16.7617	8.11546
2.15	Day 46	68756.4	2281.48	49.2736	1.635	0.0315706	0.0759933	21.9555	9.12116
2.16	Day 47	70814.4	2424.51	50.7485	1.7375	0.0274062	0.0695102	25.2916	9.97188
2.17	Day 48	72710.8	2558.54	52.1075	1.83355	0.0227096	0.0608852	30.5222	11.3845
2.18	Day 49	74470.6	2752.58	53.3686	1.97261	0.0174462	0.0596753	39.7306	11.6153
2.19	Day 50	75294.6	2910.61	53.9592	2.08586	0.0121496	0.0584311	57.0508	11.8626
2.20	Day 51	75932.7	3078.15	54.4164	2.20593	0.00829582	0.0506098	83.5538	13.6959
2.21	Day 52	76331.7	3232.19	54.7024	2.31632	0.00706532	0.0521523	98.1055	13.2908
2.22	Day 53	76983.2	3370.22	55.1693	2.41524	0.00659969	0.0449711	105.027	15.4132
2.23	Day 54	77452.9	3585.77	55.5059	2.56971	0.00659551	0.0376692	105.094	18.4009
2.24	Day 55	77963.9	3684.79	55.8721	2.64067	0.00585288	0.0297633	118.428	23.2887
2.25	Day 56	78372.3	3757.81	56.1648	2.693	0.00536768	0.0180557	129.133	38.3893
2.26	Day 57	78806.8	3796.32	56.4761	2.72059	0.00507445	0.0154592	136.596	44.8371
2.27	Day 58	79133.8	3854.33	56.7105	2.76217	0.00556751	0.0135972	124.499	50.9773
2.28	Day 59	79562.6	3919.84	57.0178	2.80912	0.0048093	0.0146771	144.126	47.2265
2.29	Day 60	80137.2	3967.85	57.4296	2.84352	0.00414316	0.0135424	167.299	51.1834
3.01	Day 61	80337.5	4025.86	57.5731	2.8851	0.00315795	0.0125952	219.493	55.0327
3.02	Day 62	80456.2	4068.87	57.6582	2.91592	0.00178606	0.0121165	388.086	57.2068
3.03	Day 63	80574	4122.38	57.7426	2.95427	0.00155772	0.0109671	444.976	63.2024
3.04	Day 64	80711.8	4164.89	57.8413	2.98473	0.00142186	0.0105887	487.492	65.461
3.05	Day 65	80839.6	4206.4	57.9329	3.01448	0.00118374	0.00952155	585.556	72.7977
3.06	Day 66	80915.1	4244.91	57.987	3.04207
3.07	Day 67	80956.4	4282.42	58.0166	3.06895
5.12	Day 133	81234	4633	58.2156	3.32019
5.13	Day 134	81237	4633	58.2177	3.32019
5.14	Day 135	81241	4633	58.2206	3.32019	4.00047e-05	5.39549e-05	17326.7	12846.8
5.15	Day 136	81243	4633	58.222	3.32019
5.16	Day 137	81247	4634	58.2249	3.32091
Note: Official statistics on COVID-19 in China became available on January 19.
WHO Situation Report -1 reported 44 cases from December 31 2019 to January 3, 2020.
See "Novel Coronavirus (2019-nCOV) Situation Report - 1, 21 January 2020."
We assigned January 1 to be the first day with over 20 cases in China.

## Sheet: Czechia
Czechia					Czechia Population: 10.3 million
				Per million Population
		Cumulative	Cumulative	Cumulative	Cumulative	Cases	Deaths	Doubling	Doubling
		Cases	Deaths	cases	Deaths	change rate	change rate	time, cases	time, deaths
3.7	Day 1	27		2.62136
3.8	Day 2	33		3.20388
3.9	Day 3	39		3.78641		0.31451		2.2039
3.10	Day 4	64		6.21359		0.316417		2.19062
3.11	Day 5	95		9.2233		0.323066		2.14553
3.12	Day 6	117		11.3592		0.272035		2.54801
3.13	Day 7	142		13.7864		0.286642		2.41817
3.14	Day 8	190		18.4466		0.297117		2.33291
3.15	Day 9	299		29.0291		0.28891		2.39918
3.16	Day 10	384		37.2816		0.270674		2.56082
3.17	Day 11	451		43.7864		0.235511		2.94317
3.18	Day 12	561		54.466		0.210425		3.29403
3.19	Day 13	767		74.466		0.21127		3.28087
3.20	Day 14	891		86.5049		0.182689		3.79414
3.21	Day 15	1050		101.942		0.130171		5.32488
3.22	Day 16	1165	1	113.107	0.0970874	0.126187		5.49303
3.23	Day 17	1291	1	125.34	0.0970874	0.130265		5.32107
3.24	Day 18	1476	3	143.301	0.291262	0.138459	0.575646	5.00616	1.20412
3.25	Day 19	1768	10	171.65	0.970874	0.155429	0.621227	4.45957	1.11577
3.26	Day 20	2027	10	196.796	0.970874	0.147905	0.43365	4.68645	1.5984
3.27	Day 21	2404	12	233.398	1.16505	0.117253	0.208227	5.91154	3.3288
3.28	Day 22	2667	17	258.932	1.65049	0.0988458	0.257405	7.01241	2.69283
3.29	Day 23	2826	23	274.369	2.23301	0.0802555	0.26761	8.63676	2.59014
3.30	Day 24	3010	28	292.233	2.71845	0.0747865	0.231997	9.26835	2.98775
3.31	Day 25	3314	35	321.748	3.39806	0.0782748	0.189082	8.8553	3.66586
4.1	Day 26	3597	43	349.223	4.17476	0.083167	0.177712	8.3344	3.9004
4.2	Day 27	3865	49	375.243	4.75728	0.0754226	0.158577	9.19018	4.37105
4.3	Day 28	4198	57	407.573	5.53398	0.0613803	0.135716	11.2927	5.10733
4.4	Day 29	4481	66	435.049	6.40777	0.0559282	0.128725	12.3935	5.38472
4.5	Day 30	4598	74	446.408	7.18447	0.0452029	0.119684	15.3341	5.79146
4.6	Day 31	4834	82	469.32	7.96117	0.0430947	0.120794	16.0843	5.73828
4.7	Day 32	5030	92	488.35	8.93204	0.0484366	0.114527	14.3104	6.05225
4.8	Day 33	5324	107	516.893	10.3883	0.0431204	0.111328	16.0747	6.22618
4.9	Day 34	5581	117	541.845	11.3592	0.0404756	0.0977166	17.1251	7.09345
4.10	Day 35	5744	128	557.67	12.4272	0.0300086	0.0776944	23.0983	8.92145
4.11	Day 36	5914	136	574.175	13.2039	0.0210388	0.073518	32.9461	9.42827
4.12	Day 37	6003	146	582.816	14.1748	0.017196	0.0649894	40.3087	10.6655
4.13	Day 38	6071	157	589.417	15.2427	0.0163221	0.0498332	42.4667	13.9093
4.14	Day 39	6153	166	597.379	16.1165	0.0177613	0.0350893	39.0257	19.7538
4.15	Day 40	6313	166	612.913	16.1165	0.0194049	0.0285595	35.7202	24.2702
4.16	Day 41	6445	168	625.728	16.3107	0.0200201	0.0202423	34.6226	34.2426
4.17	Day 42	6561	176	636.99	17.0874	0.017029	0.0324398	40.7039	21.3672
4.18	Day 43	6666	180	647.184	17.4757	0.0174886	0.0385377	39.6342	17.9862
4.19	Day 44	6758	189	656.117	18.3495	0.0177938	0.036909	38.9545	18.7799
4.20	Day 45	6912	196	671.068	19.0291	0.0173132	0.0337298	40.0357	20.55
4.21	Day 46	7045	204	683.981	19.8058	0.0158038	0.0287098	43.8596	24.1432
4.22	Day 47	7144	206	693.592	20	0.0131396	0.0265951	52.7525	26.063
4.23	Day 48	7199	212	698.932	20.5825	0.0110713	0.0211393	62.6077	32.7894
4.24	Day 49	7285	218	707.282	21.165	0.00934175	0.0209425	74.1989	33.0977
4.25	Day 50	7364	222	714.951	21.5534	0.00880277	0.0148785	78.742	46.5871
4.26	Day 51	7416	224	720	21.7476	0.00783742	0.0123067	88.4407	56.3226
4.27	Day 52	7457	225	723.981	21.8447	0.00762295	0.0131609	90.929	52.667
4.28	Day 53	7517	229	729.806	22.233	0.00923273	0.0182877	75.075	37.9023
4.29	Day 54	7592	234	737.087	22.7184	0.00963491	0.0253381	71.9412	27.3559
4.30	Day 55	7695	241	747.087	23.3981	0.0082114	0.0219347	84.4128	31.6004
5.1	Day 56	7750	249	752.427	24.1748	0.00656479	0.0195171	105.586	35.5149
5.2	Day 57	7768	250	754.175	24.2718	0.00441178	0.0170407	157.113	40.6761
5.3	Day 58	7794	253	756.699	24.5631	0.00507713	0.0117669	136.524	58.9066
5.4	Day 59	7832	258	760.388	25.0485	0.00698192	0.013622	99.2774	50.8842
5.5	Day 60	7909	261	767.864	25.3398	0.00792414	0.0143994	87.4728	48.1373
5.6	Day 61	7988	264	775.534	25.6311	0.00813361	0.0141281	85.2201	49.0618
5.7	Day 62	8045	268	781.068	26.0194	0.0062433	0.0139701	111.023	49.6164
5.8	Day 63	8091	273	785.534	26.5049	0.00462029	0.0138157	150.023	50.1711
5.9	Day 64	8109	276	787.282	26.7961	0.00452682	0.0118419	153.12	58.5333
5.10	Day 65	8137	279	790	27.0874	0.00447097	0.00987561	155.033	70.1878
5.11	Day 66	8192	281	795.34	27.2816
5.12	Day 67	8237	284	799.709	27.5728
7.17	Day 133	13762	359	1336.12	34.8544
7.18	Day 134	13874	359	1346.99	34.8544
7.19	Day 135	13965	360	1355.83	34.9515	0.0103028	0.00208046	67.2772	333.171
7.20	Day 136	14134	360	1372.23	34.9515
7.21	Day 137	14341	362	1392.33	35.1456

## Sheet: Denmark
Denmark				Denmark Population: 5.8 millon
				Per million Population
		Cumulative	Cumulative	Cumulative	Cumulative	Change	Change	Doubling	Doubling
		Cases	Deaths	cases	deaths	rate, cases	rate, deaths	time, cases	time, death
2020-03-06	Day 1	21		3.62069
2020-03-07	Day 2	27		4.65517
2020-03-08	Day 3	35		6.03448		0.630956		1.09857
2020-03-09	Day 4	90		15.5172		0.736597		0.941013
2020-03-10	Day 5	262		45.1724		0.739471		0.937356
2020-03-11	Day 6	514		88.6207		0.547447		1.26614
2020-03-12	Day 7	674		116.207		0.290071		2.38958
2020-03-13	Day 8	804		138.621		0.129837		5.33858
2020-03-14	Day 9	836	1	144.138	0.172414	0.0761501		9.10238
2020-03-15	Day 10	864	2	148.966	0.344828	0.0487218		14.2266
2020-03-16	Day 11	914	4	157.586	0.689655	0.0586403	0.346574	11.8203	2
2020-03-17	Day 12	977	4	168.448	0.689655	0.0717034	0.274653	9.66686	2.52372
2020-03-18	Day 13	1057	4	182.241	0.689655	0.0792651	0.202733	8.74467	3.41902
2020-03-19	Day 14	1151	6	198.448	1.03448	0.0763589	0.294664	9.07749	2.35233
2020-03-20	Day 15	1255	9	216.379	1.55172	0.0693649	0.294664	9.99276	2.35233
2020-03-21	Day 16	1326	13	228.621	2.24138	0.0594513	0.346574	11.6591	2
2020-03-22	Day 17	1395	13	240.517	2.24138	0.044749	0.317128	15.4897	2.1857
2020-03-23	Day 18	1460	24	251.724	4.13793	0.0656201	0.240353	10.563	2.88387
2020-03-24	Day 19	1501	32	258.793	5.51724	0.0741951	0.287156	9.34222	2.41384
2020-03-25	Day 20	1724	34	297.241	5.86207	0.0843626	0.193297	8.21629	3.58591
2020-03-26	Day 21	1877	41	323.621	7.06897	0.0956951	0.177163	7.24329	3.91249
2020-03-27	Day 22	2046	52	352.759	8.96552	0.082184	0.187576	8.43409	3.69528
2020-03-28	Day 23	2201	65	379.483	11.2069	0.0792378	0.157558	8.74768	4.3993
2020-03-29	Day 24	2395	72	412.931	12.4138	0.0837337	0.137141	8.27799	5.05425
2020-03-30	Day 25	2577	77	444.31	13.2759	0.0861865	0.117501	8.04241	5.89908
2020-03-31	Day 26	2860	90	493.103	15.5172	0.0865665	0.13388	8.00711	5.17739
2020-04-01	Day 27	3107	104	535.69	17.931	0.0942487	0.147667	7.35445	4.69398
2020-04-02	Day 28	3386	123	583.793	21.2069	0.0886349	0.145399	7.82025	4.76722
2020-04-03	Day 29	3757	139	647.759	23.9655	0.0852191	0.135749	8.1337	5.1061
2020-04-04	Day 30	4077	161	702.931	27.7586	0.0809656	0.104731	8.56101	6.61835
2020-04-05	Day 31	4369	179	753.276	30.8621	0.0749793	0.094683	9.24451	7.32071
2020-04-06	Day 32	4681	187	807.069	32.2414	0.070352	0.0757727	9.85256	9.14772
2020-04-07	Day 33	5071	203	874.31	35	0.0636157	0.0701686	10.8958	9.87831
2020-04-08	Day 34	5402	218	931.379	37.5862	0.0544042	0.0695699	12.7407	9.96332
2020-04-09	Day 35	5635	237	971.552	40.8621	0.0418886	0.0618689	16.5474	11.2035
2020-04-10	Day 36	5819	247	1003.28	42.5862	0.0333944	0.0562442	20.7564	12.3239
2020-04-11	Day 37	5996	260	1033.79	44.8276	0.0286014	0.0461073	24.2347	15.0334
2020-04-12	Day 38	6174	273	1064.48	47.069	0.0280912	0.0477638	24.6749	14.512
2020-04-13	Day 39	6318	285	1089.31	49.1379	0.0270438	0.0431649	25.6306	16.0581
2020-04-14	Day 40	6511	299	1122.59	51.5517	0.0270316	0.0404923	25.6421	17.118
2020-04-15	Day 41	6681	309	1151.9	53.2759	0.0282205	0.0411555	24.5618	16.8422
2020-04-16	Day 42	6879	321	1186.03	55.3448	0.0266011	0.0364988	26.0571	18.991
2020-04-17	Day 43	7073	336	1219.48	57.931	0.025012	0.0346941	27.7126	19.9788
2020-04-18	Day 44	7242	346	1248.62	59.6552	0.0221069	0.0314282	31.3543	22.055
2020-04-19	Day 45	7384	355	1273.1	61.2069	0.0210715	0.024098	32.895	28.7637
2020-04-20	Day 46	7515	364	1295.69	62.7586	0.0221208	0.0260509	31.3346	26.6074
2020-04-21	Day 47	7695	370	1326.72	63.7931	0.0223024	0.0260583	31.0795	26.5999
2020-04-22	Day 48	7912	384	1364.14	66.2069	0.022113	0.0254457	31.3457	27.2403
2020-04-23	Day 49	8073	394	1391.9	67.931	0.0232509	0.0304946	29.8116	22.7302
2020-04-24	Day 50	8210	403	1415.52	69.4828	0.0201176	0.0235907	34.4548	29.3822
2020-04-25	Day 51	8445	418	1456.03	72.069	0.018642	0.0201083	37.182	34.4707
4.26	Day 52	8575	422	1478.45	72.7586	0.0187944	0.018527	36.8806	37.4128
4.27	Day 53	8698	427	1499.66	73.6207	0.0161346	0.0145221	42.9602	47.7306
4.28	Day 54	8851	434	1526.03	74.8276	0.0164442	0.0171692	42.1515	40.3715
4.29	Day 55	9008	443	1553.1	76.3793	0.0170258	0.0186106	40.7115	37.2447
4.30	Day 56	9158	452	1578.97	77.931	0.0152309	0.0225676	45.5092	30.7143
5.1	Day 57	9311	460	1605.34	79.3103	0.0138992	0.0221288	49.8695	31.3233
5.2	Day 58	9407	475	1621.9	81.8966	0.0136001	0.0217067	50.9662	31.9323
5.3	Day 59	9523	484	1641.9	83.4483	0.0133316	0.0223409	51.9927	31.0259
5.4	Day 60	9670	493	1667.24	85	0.0137279	0.0158055	50.4918	43.8549
5.5	Day 61	9821	503	1693.28	86.7241	0.0142852	0.0150346	48.522	46.1035
5.6	Day 62	9938	506	1713.45	87.2414	0.0137806	0.0142896	50.2986	48.5071
5.7	Day 63	10083	514	1738.45	88.6207	0.012366	0.0111778	56.0528	62.0113
5.8	Day 64	10218	522	1761.72	90	0.0120561	0.010166	57.4933	68.1831
5.9	Day 65	10319	526	1779.14	90.6897	0.0104404	0.00624432	66.3906	111.004
5.10	Day 66	10429	527	1798.1	90.8621
5.11	Day 67	10513	527	1812.59	90.8621
7.16	Day 133	13124	610	2262.76	105.172
7.17	Day 134	13173	611	2271.21	105.345
7.18	Day 135	13173	611	2271.21	105.345	0.00261505	0.000409501	265.061	1692.67
7.19	Day 136	13173	611	2271.21	105.345
7.20	Day 137	13262	611	2286.55	105.345

## Sheet: France
France				France Population: 67 million
				Per million Population
		Cumulative	Cumulative	Cumulative	Cumulative	Change	Change	Doubling	Doubling
		Cases	Deaths	Cases	deaths	rate, cases	rate, deaths	time, cases	time, deaths
2.27	Day 1	38	2	0.567164	0.0298507
2.28	Day 2	57	2	0.850746	0.0298507
2.29	Day 3	100	2	1.49254	0.0298507	0.403672	0.101366	1.71711	6.83805
3.1	Day 4	130	2	1.9403	0.0298507	0.328384	0.173287	2.11078	4
3.2	Day 5	191	3	2.85075	0.0447761	0.26183	0.173287	2.64732	4
3.3	Day 6	212	4	3.16418	0.0597015	0.294959	0.313191	2.34997	2.21318
3.4	Day 7	285	4	4.25373	0.0597015	0.307326	0.274653	2.25541	2.52372
3.5	Day 8	423	7	6.31343	0.104478	0.374706	0.346574	1.84984	2
3.6	Day 9	653	9	9.74627	0.134328	0.361265	0.389536	1.91867	1.77942
3.7	Day 10	949	16	14.1642	0.238806	0.301348	0.363822	2.30016	1.90518
3.8	Day 11	1209	19	18.0448	0.283582	0.251259	0.324821	2.7587	2.13394
3.9	Day 12	1412	30	21.0746	0.447761	0.21924	0.274653	3.16159	2.52372
3.10	Day 13	1784	33	26.6269	0.492537	0.216652	0.291609	3.19936	2.37698
3.11	Day 14	2281	48	34.0448	0.716418	0.238182	0.242063	2.91015	2.8635
3.12	Day 15	2876	61	42.9254	0.910448	0.231249	0.253588	2.9974	2.73336
3.13	Day 16	3661	79	54.6418	1.1791	0.216509	0.243247	3.20147	2.84957
3.14	Day 17	4499	91	67.1493	1.35821	0.208914	0.221585	3.31786	3.12814
3.15	Day 18	5423	127	80.9403	1.89552	0.186843	0.198835	3.70978	3.48605
3.16	Day 19	6633	148	99	2.20896	0.177037	0.267218	3.91526	2.59394
3.17	Day 20	7730	175	115.373	2.61194	0.176698	0.268677	3.92278	2.57986
3.18	Day 21	9134	265	136.328	3.95522	0.160648	0.278009	4.3147	2.49326
3.19	Day 22	10995	372	164.104	5.55224	0.156552	0.291679	4.42758	2.3764
3.20	Day 23	12612	450	188.239	6.71642	0.140427	0.233375	4.93598	2.9701
3.21	Day 24	14459	562	215.806	8.38806	0.147766	0.20951	4.69083	3.30843
3.22	Day 25	16018	674	239.075	10.0597	0.142529	0.223454	4.86319	3.10196
3.23	Day 26	19856	860	296.358	12.8358	0.139209	0.215546	4.97919	3.21577
3.24	Day 27	22304	1100	332.896	16.4179	0.149728	0.230699	4.62937	3.00455
3.25	Day 28	25233	1331	376.612	19.8657	0.126727	0.210367	5.46959	3.29495
3.26	Day 29	29155	1696	435.149	25.3134	0.130393	0.185917	5.31582	3.72826
3.27	Day 30	32964	1995	492	29.7761	0.116267	0.167971	5.96169	4.12658
3.28	Day 31	37575	2314	560.821	34.5373	0.105996	0.144577	6.53934	4.79431
3.29	Day 32	40174	2606	599.612	38.8955	0.114572	0.142096	6.04991	4.87801
3.30	Day 33	44550	3024	664.925	45.1343	0.10413	0.138697	6.65657	4.99756
3.31	Day 34	52128	3522	778.03	52.5672	0.0965239	0.181404	7.1811	3.82102
4.1	Day 35	56989	4030	850.582	60.1493	0.0918846	0.191421	7.54367	3.62107
4.2	Day 36	59105	5384	882.164	80.3582	0.0686658	0.190795	10.0945	3.63294
4.3	Day 37	64338	6503	960.269	97.0597	0.0531106	0.173659	13.051	3.99143
4.4	Day 38	68605	7555	1023.96	112.761	0.0575015	0.125767	12.0544	5.51135
4.5	Day 39	70478	8072	1051.91	120.478	0.0486743	0.115455	14.2405	6.00361
4.6	Day 40	74390	8904	1110.3	132.896	0.0447348	0.0907192	15.4946	7.64058
4.7	Day 41	78167	10320	1166.67	154.03	0.0507307	0.103238	13.6633	6.71406
4.8	Day 42	82048	10860	1224.6	162.09	0.0494928	0.0981448	14.005	7.0625
4.9	Day 43	86334	12199	1288.57	182.075	0.0455527	0.0729902	15.2164	9.49645
4.10	Day 44	90676	13185	1353.37	196.791	0.0377014	0.070188	18.3852	9.87558
4.11	Day 45	93790	13819	1399.85	206.254	0.0318798	0.0509062	21.7425	13.6162
4.12	Day 46	95403	14380	1423.93	214.627	0.033246	0.043884	20.849	15.795
4.13	Day 47	98076	14954	1463.82	223.194	0.0310806	0.0540176	22.3016	12.8319
4.14	Day 48	103573	15715	1545.87	234.552	0.0329583	0.0547964	21.031	12.6495
4.15	Day 49	106206	17152	1585.16	256	0.0269786	0.0554044	25.6925	12.5107
4.16	Day 50	108847	17904	1624.58	267.224	0.0191557	0.0514371	36.185	13.4756
4.17	Day 51	109252	18664	1630.63	278.567	0.0146286	0.034626	47.383	20.0181
4.18	Day 52	111821	19305	1668.97	288.134	0.0130005	0.0307333	53.3171	22.5536
4.19	Day 53	112606	19700	1680.69	294.03	0.0178205	0.0268005	38.8959	25.8632
4.20	Day 54	114657	20246	1711.3	302.179	0.0158731	0.0248086	43.6682	27.9397
4.21	Day 55	117324	20776	1751.1	310.09	0.0175686	0.0257124	39.4538	26.9577
4.22	Day 56	119151	21319	1778.37	318.194	0.0166986	0.0232926	41.5093	29.7582
4.23	Day 57	120804	21834	1803.04	325.881	0.0140653	0.0209493	49.2807	33.0868
4.24	Day 58	122577	22223	1829.51	331.687	0.0111291	0.017163	62.2825	40.3862
4.25	Day 59	124114	22592	1852.45	337.194	0.0151265	0.0159241	45.8235	43.5281
4.26	Day 60	124575	22834	1859.33	340.806	0.0116845	0.0154214	59.3219	44.9472
4.27	Day 61	128339	23270	1915.51	347.313	0.0107764	0.0157699	64.3207	43.9539
4.28	Day 62	128442	23637	1917.04	352.791	0.0103853	0.0160908	66.7429	43.0771
4.29	Day 63	129581	24063	1934.04	359.149	0.00357033	0.0135903	194.141	51.0031
4.30	Day 64	129859	24352	1938.19	363.463	0.00488989	0.0113616	141.751	61.0079
5.1	Day 65	130185	24570	1943.06	366.716	0.0032699	0.00825677	211.978	83.949
5.2	Day 66	130979	24736	1954.91	369.194
5.3	Day 67	131287	24871	1959.51	371.209
7.7	Day 133	168810	29908	2519.55	446.388
7.8	Day 134	169473	29940	2529.45	446.866
7.9	Day 135	170094	29954	2538.72	447.075	0.00383717	0.000626138	180.64	1107.02
7.10	Day 136	170752	29979	2548.54	447.448
7.11	Day 137	171421	29983	2558.52	447.507

[truncated: 19 more sheets: Germany, Indonesia, Iran, Ireland, Israel, Japan, S. Korea, Mexico, Netherlands, Norway, Pakistan, Peru, Poland, Portugal, Romania, Russia, Saudi Arabia, Spain, Switzerland]
